# Supplementary material for: A micro-solid phase extraction in glass pipette packed with amino-functionalized silica for rapid analysis of petroleum acids in crude oils
Source: Royal Society of Chemistry journal article supplement (doi:10.1039/c7ra06763a), 2017-01-01
Supplement: c7ra06763a1.pdf [file c7ra06763a1.pdf]

## Supporting Information

for

### **“A micro-solid phase extraction in glass pipette packed with amino-functionalized silica for rapid analysis of petroleum acids in crude oils”**

Gang-Tian Zhu,<sup>\*, a</sup> Sheng He,<sup>a</sup> Xiao-Mei He,<sup>b</sup> Shu-Kui Zhu,<sup>c</sup> Yu-Qi Feng<sup>b</sup>

<sup>a</sup> Key Laboratory of Tectonics and Petroleum Resources (Ministry of Education), China University of Geosciences, Wuhan 430074, P.R. China. E-mail: zhugangtian@163.com

<sup>b</sup> Key Laboratory of Analytical Chemistry for Biology and Medicine (Ministry of Education), Department of Chemistry, Wuhan University, Wuhan 430072, P.R. China.

<sup>c</sup> State Key Laboratory of Biogeology and Environmental Geology, China University of Geosciences, Wuhan 430074, China

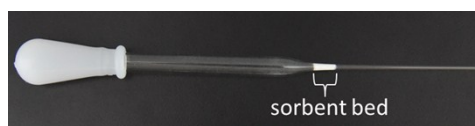

**Figure S1.** Photographic image of the glass pipette micro-SPE device.

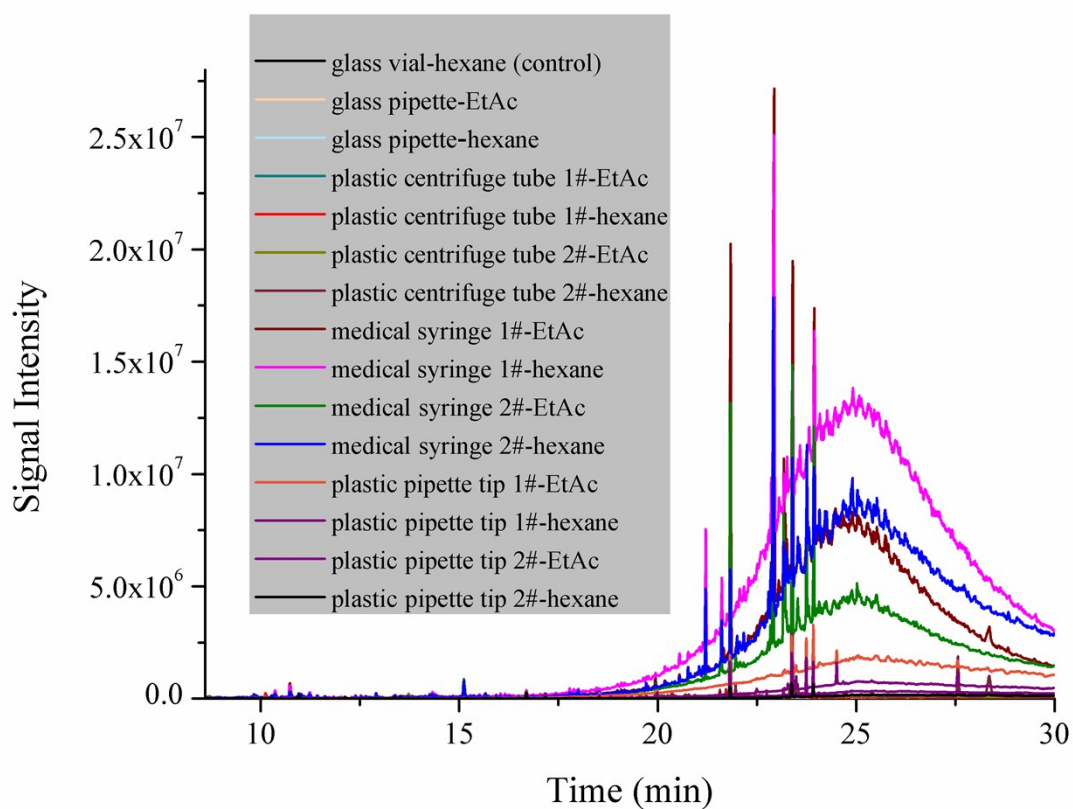

**Figure S2.** Total ion chromatograms of solutions obtained from washing different vessels with ethyl acetate (EtAc) or hexane followed by derivatization with MTBSTFA. The names of different groups were defined as “vessel-solvent”. For instance, “glass pipette-EtAc” represents the result produced by washing glass pipette with EtAc. The marks “1#” and “2#” represent different manufacturers.

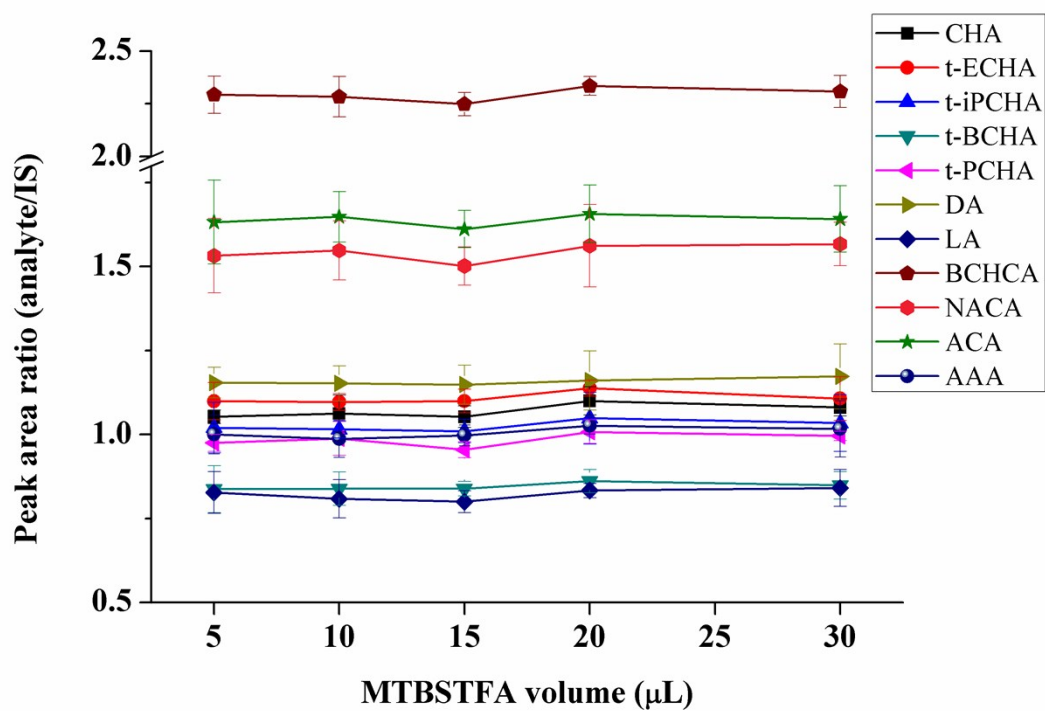

**Figure S3.** Effect of volume of MTBSTFA on derivatization efficiency in TFA/EtAc

(1/99,

v/v).

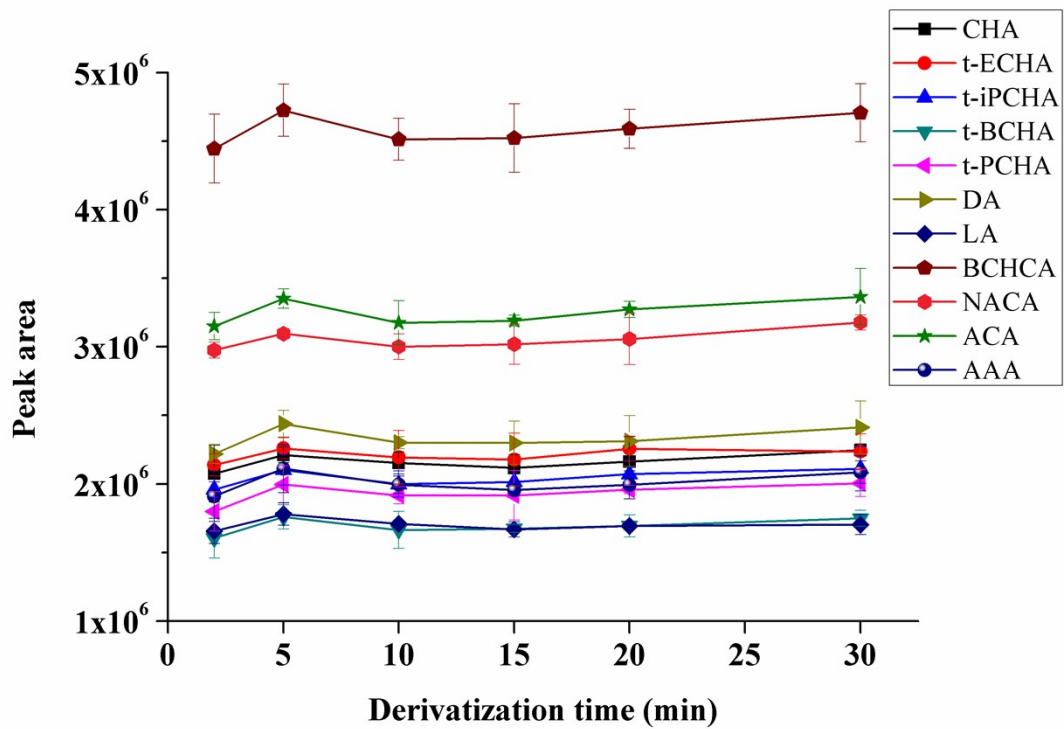

**Figure S4.** Effect of reaction time on derivatization efficiency.

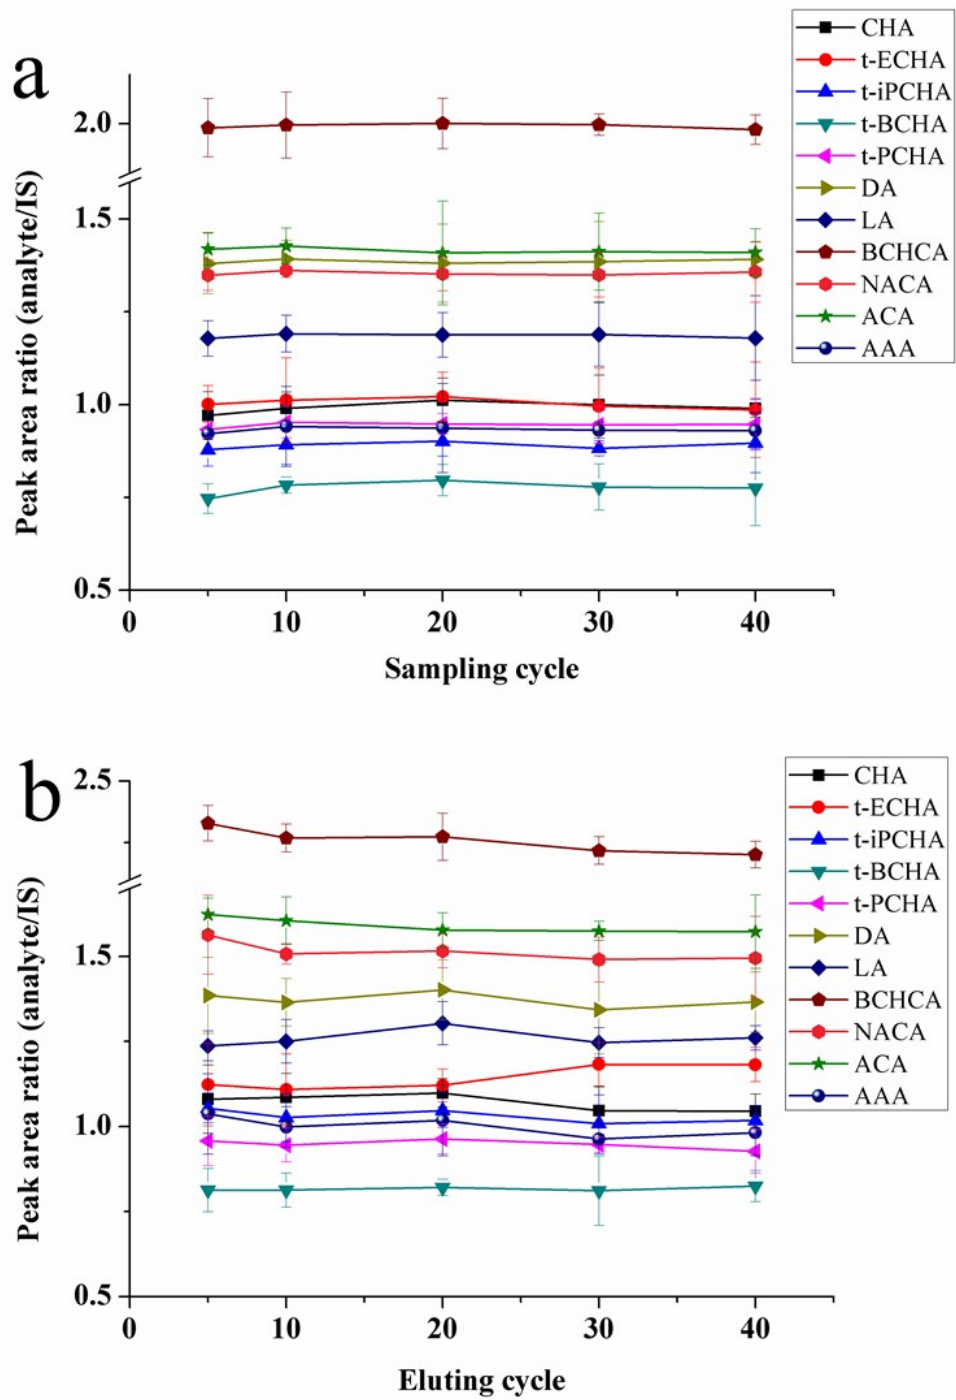

**Figure S5.** Effect of sampling cycle (a) and eluting cycle (b) on extraction efficiency.

**Table S1.** Chemical structures, molecular weights (Mw), retention times ( $t_R$ ) and target ions for the GC-MS analysis of the petroleum acids after derivatization.

| Analytes | Chemical structure                                                                  | Mw  | $t_R$ | Quantifier (m/z) |
|----------|-------------------------------------------------------------------------------------|-----|-------|------------------|
| CHA      | 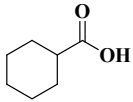   | 128 | 9.39  | 185              |
| t-ECHA   |    | 156 | 12.70 | 213              |
| t-iPCHA  |    | 170 | 14.48 | 227              |
| t-BCHA   |    | 184 | 16.34 | 241              |
| t-PCHA   |   | 198 | 18.00 | 255              |
| DA       |  | 172 | 13.99 | 229              |
| LA       |  | 200 | 17.46 | 257              |
| BCHCA    |  | 140 | 10.89 | 197              |
| NACA     |  | 166 | 14.13 | 223              |
| ACA      |  | 180 | 16.62 | 237              |
| AAA      |  | 194 | 18.19 | 251              |
| NAA (IS) |  | 186 | 19.05 | 243              |

**Table S2.** Peak areas of detected hexadecanoic acid and octadecanoic acid after derivatization.

|                                   | Peak Area (10 <sup>6</sup> ) |                   |
|-----------------------------------|------------------------------|-------------------|
|                                   | Hexadecanoic Acid            | Octadecanoic Acid |
| glass vial-hexane (control)       | 0.56                         | 0.28              |
| glass pipette-EtAc                | 0.75                         | 0.33              |
| glass pipette-hexane              | 0.49                         | 0.24              |
| plastic centrifuge tube 1#-EtAc   | 269.23                       | 292.63            |
| plastic centrifuge tube 1#-hexane | 238.21                       | 268.43            |
| plastic centrifuge tube 2#-EtAc   | 1032.18                      | 787.38            |
| plastic centrifuge tube 2#-hexane | 911.45                       | 766.48            |
| medical syringe 1#-EtAc           | 1379.70                      | 1085.12           |
| medical syringe 1#-hexane         | 289.35                       | 374.50            |
| medical syringe 2#-EtAc           | 805.72                       | 788.52            |
| medical syringe 2#-hexane         | 223.04                       | 328.70            |
| plastic pipette tip 1#-EtAc       | 72.04                        | 88.50             |
| plastic pipette tip 1#-hexane     | 78.69                        | 88.07             |
| plastic pipette tip 2#-EtAc       | 57.83                        | 52.44             |
| plastic pipette tip 2#-hexane     | 27.45                        | 32.97             |

The names of different groups were defined as “vessel-solvent”. For instance, “glass pipette-EtAc” represents the result produced by washing glass pipette with ethyl acetate. The marks “1#” and “2#” represent different manufacturers.



**Table S3.** Recoveries of petroleum acids in crude oil with the micro-SPE method.

|               | CHA   | t-ECHA | t-iPCHA | t-BCHA | t-PCHA | DA    | LA    | BCHCA | NACA  | ACA   | AAA   |
|---------------|-------|--------|---------|--------|--------|-------|-------|-------|-------|-------|-------|
| Recovery      | 76    | 83     | 84      | 91     | 89     | 74    | 89    | 76    | 79    | 83    | 92    |
| (RSD, %; n=5) | (5.4) | (3.8)  | (6.3)   | (5.9)  | (4.2)  | (4.8) | (6.1) | (3.4) | (2.9) | (5.7) | (5.6) |

**Table S4.** Calibration curves, LODs and LOQs of petroleum acids.

| Analytes | Linear dynamic  | Regression line |           |                | LODs   | LOQs   |
|----------|-----------------|-----------------|-----------|----------------|--------|--------|
|          | range<br>(ng/g) | Slope           | Intercept | <i>R</i> value | (ng/g) | (ng/g) |
| CHA      | 20-5000         | 0.0010          | -0.0063   | 0.9998         | 6      | 20     |
| t-ECHA   | 10-5000         | 0.0011          | -0.0033   | 0.9993         | 3      | 9      |
| t-iPCHA  | 10-5000         | 0.0010          | -0.0051   | 0.9994         | 3      | 10     |
| t-BCHA   | 10-5000         | 0.0009          | -0.0038   | 0.9997         | 2      | 7      |
| t-PCHA   | 10-5000         | 0.0011          | -0.0046   | 0.9986         | 3      | 10     |
| DA       | 10-5000         | 0.0012          | 0.0038    | 0.9996         | 2      | 7      |
| LA       | 10-5000         | 0.0010          | 0.0014    | 0.9991         | 2      | 6      |
| BCHCA    | 10-5000         | 0.0020          | 0.0062    | 0.9984         | 3      | 9      |
| NACA     | 10-5000         | 0.0014          | 0.0176    | 0.9983         | 3      | 9      |
| ACA      | 10-5000         | 0.0015          | 0.0132    | 0.9997         | 3      | 10     |
| AAA      | 10-5000         | 0.0010          | 0.0006    | 0.9993         | 3      | 10     |
